# Supplementary material for: Minor ginsenoside F1 improves memory in APP/PS1 mice
Source: PubMed Central journal article supplement (PMC6728944; doi:10.1186/s13041-019-0495-7), 2019-09-05

**Additional Fig. 1** Uncropped western blot images for hippocampus samples (related with Fig 3a)

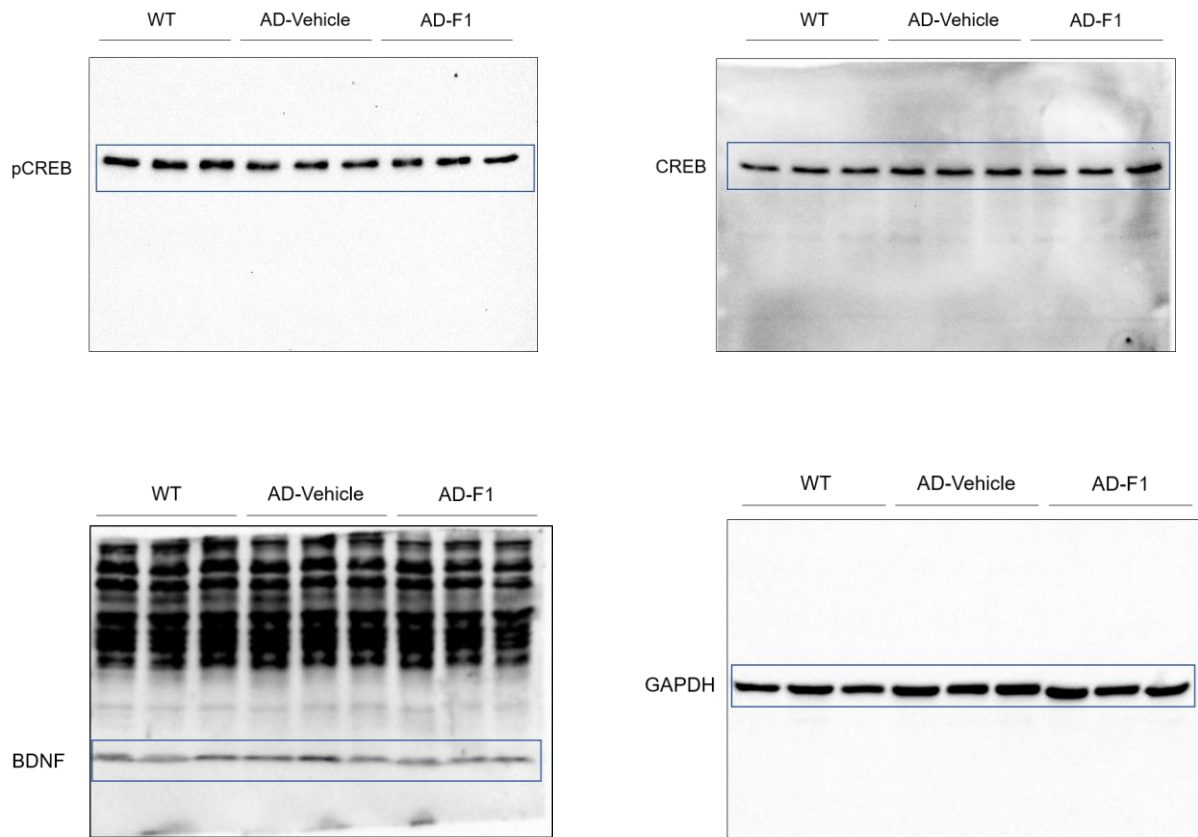

Supplement: 13041_2019_495_MOESM1_ESM.pdf [file 13041_2019_495_MOESM1_ESM.pdf]
